# Supplementary material for: Development and validation of a novel risk prediction algorithm to estimate 10-year risk of oesophageal cancer in primary care: prospective cohort study and evaluation of performance against two other risk prediction models
Source: PubMed Central journal article supplement (PMC10450987; doi:10.1016/j.lanepe.2023.100700), 2023-08-14

# QResearch men

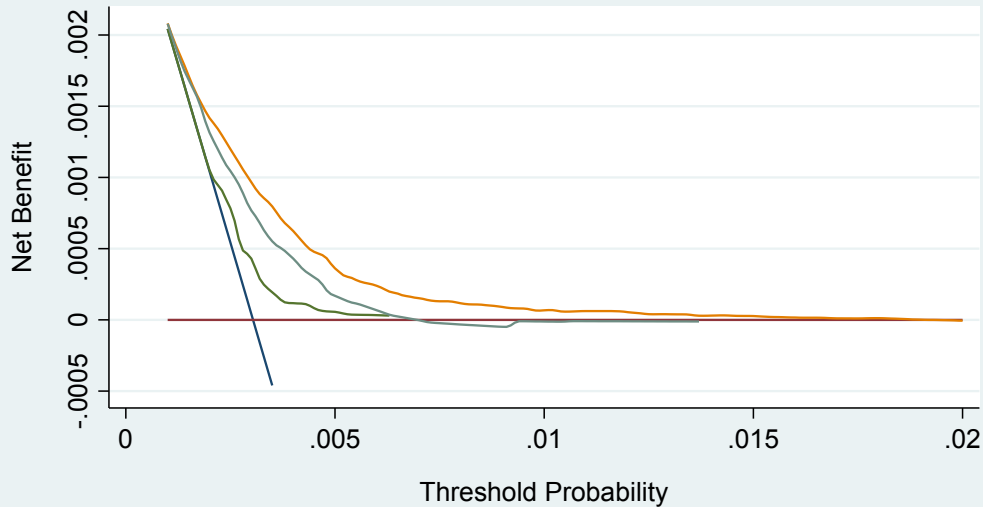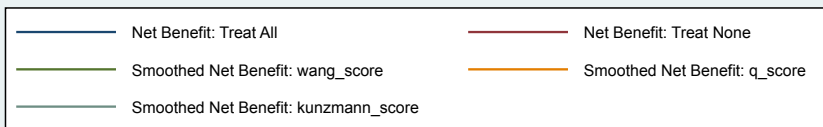

Supplement: mmc4.pdf [file mmc4.pdf]
